# Supplementary material for: Progranulin Levels in Plasma and Cerebrospinal Fluid in Granulin Mutation Carriers
Source: PubMed Central journal article supplement — Dement Geriatr Cogn Dis Extra. 2016 Jul 22;6(2):330–40. doi: 10.1159/000447738 (PMC5040889; doi:10.1159/000447738), 2016-07-22
Supplement: dee-0006-0330-s01.pdf [file dee-0006-0330-s01.pdf]

## Progranulin levels in plasma and CSF in granulin mutation carriers

Lieke H.H. Meeter MD, Holger Patzke PhD, Gordon Loewen PhD, Elise G.P. Dopfer PhD, Yolande A.L. Pijnenburg PhD MD, Rick van Minkelen PhD, Prof. John C. van Swieten PhD MD

### *Supplementary Material – Supplementary Table 1*

| <b>Supplementary Table 1. PGRN levels by SNP genotype</b>                                                                                                                                                                                                                                                                                      |                       |                  |                   |                   |           |                         |
|------------------------------------------------------------------------------------------------------------------------------------------------------------------------------------------------------------------------------------------------------------------------------------------------------------------------------------------------|-----------------------|------------------|-------------------|-------------------|-----------|-------------------------|
| SNP (minor allele)                                                                                                                                                                                                                                                                                                                             |                       | genotype         |                   |                   | $\beta^a$ | $p$ -value <sup>a</sup> |
| rs5848 (A), <i>GRN</i>                                                                                                                                                                                                                                                                                                                         |                       | GG               | GA                | AA                |           |                         |
| Plasma                                                                                                                                                                                                                                                                                                                                         | Entire group          | 9.5 (5.2-34.0)   | 11.3 (5.7-39.2)   | 21.6 (6.5-25.0)   | -.050     | 0.25                    |
|                                                                                                                                                                                                                                                                                                                                                | <i>n</i> =            | 24               | 37                | 3                 |           |                         |
|                                                                                                                                                                                                                                                                                                                                                | Carriers              | 8.6 (5.2-9.8)    | 7.6 (5.7-11.3)    | 6.5 <sup>b</sup>  | -.399     | 0.04                    |
|                                                                                                                                                                                                                                                                                                                                                | <i>n</i> =            | 15               | 19                | 1                 |           |                         |
|                                                                                                                                                                                                                                                                                                                                                | Controls              | 28.5 (25.0-34.0) | 28.8 (21.5-39.2)  | 23.3 (21.6-25.0)  | -.078     | 0.72                    |
| <i>n</i> =                                                                                                                                                                                                                                                                                                                                     | 9                     | 18               | 1                 |                   |           |                         |
| CSF                                                                                                                                                                                                                                                                                                                                            | Entire group          | 0.36 (0.22-1.25) | 0.39 (0.15-0.84)  | 0.56 (0.33-0.78)  | -.165     | 0.06                    |
|                                                                                                                                                                                                                                                                                                                                                | <i>n</i> =            | 12               | 21                | 2                 |           |                         |
|                                                                                                                                                                                                                                                                                                                                                | Carriers              | 0.26 (0.22-0.44) | 0.29 (0.15-0.46)  | 0.33 <sup>b</sup> | .024      | 0.91                    |
|                                                                                                                                                                                                                                                                                                                                                | <i>n</i> =            | 9                | 13                | 1                 |           |                         |
|                                                                                                                                                                                                                                                                                                                                                | Controls              | 1.13 (0.77-0.13) | 0.73 (0.60-0.84)  | 0.78 <sup>b</sup> | -.794     | 0.03                    |
| <i>n</i> =                                                                                                                                                                                                                                                                                                                                     | 3                     | 8                | 1                 |                   |           |                         |
| rs646776 (G), near <i>SORT1</i>                                                                                                                                                                                                                                                                                                                |                       | AA               | AG                | GG                |           |                         |
| Plasma                                                                                                                                                                                                                                                                                                                                         | Entire group          | 11.0 (5.7-39.2)  | 8.1 (6.4-33.7)    | 5.2 <sup>b</sup>  | -.051     | 0.19                    |
|                                                                                                                                                                                                                                                                                                                                                | <i>n</i> =            | 53               | 10                | 1                 |           |                         |
|                                                                                                                                                                                                                                                                                                                                                | Carriers              | 8.2 (5.7-11.3)   | 7.3 (6.4-8.4)     | 5.2 <sup>b</sup>  | -.423     | 0.01                    |
|                                                                                                                                                                                                                                                                                                                                                | <i>n</i> =            | 28               | 6                 | 1                 |           |                         |
|                                                                                                                                                                                                                                                                                                                                                | Controls              | 28.6 (21.5-39.2) | 26.3 (22.2-33.7)  | -                 | -.098     | 0.61                    |
| <i>n</i> =                                                                                                                                                                                                                                                                                                                                     | 25                    | 4                | 0                 |                   |           |                         |
| CSF                                                                                                                                                                                                                                                                                                                                            | Entire group          | 0.39 (0.15-1.25) | 0.31 (0.26-1.13)  | -                 | .100      | 0.25                    |
|                                                                                                                                                                                                                                                                                                                                                | <i>n</i> =            | 31               | 4                 | 0                 |           |                         |
|                                                                                                                                                                                                                                                                                                                                                | Carriers              | 0.30 (0.15-0.46) | 0.28 (0.26-0.33)  | -                 | -.048     | 0.83                    |
|                                                                                                                                                                                                                                                                                                                                                | <i>n</i> =            | 20               | 3                 | 0                 |           |                         |
|                                                                                                                                                                                                                                                                                                                                                | Controls              | 0.76 (0.60-1.25) | 1.13 <sup>b</sup> | -                 | .562      | 0.10                    |
| <i>n</i> =                                                                                                                                                                                                                                                                                                                                     | 11                    | 1                | 0                 |                   |           |                         |
| rs1990622 (C), near <i>TMEM106B</i>                                                                                                                                                                                                                                                                                                            |                       | TT               | TC                | CC                |           |                         |
| Plasma                                                                                                                                                                                                                                                                                                                                         | Entire group          | 9.6 (6.5-39.2)   | 15.5 (5.2-36.9)   | 24.2 (6.5-31.6)   | -.095     | 0.02                    |
|                                                                                                                                                                                                                                                                                                                                                | <i>n</i> =            | 21               | 34                | 7                 |           |                         |
|                                                                                                                                                                                                                                                                                                                                                | Carriers <sup>c</sup> | 8.4 (6.5-11.3)   | 7.4 (5.2-9.5)     | 8.4 (6.5-8.9)     | -.347     | 0.06                    |
|                                                                                                                                                                                                                                                                                                                                                | <i>n</i> =            | 14               | 17                | 3                 |           |                         |
|                                                                                                                                                                                                                                                                                                                                                | Controls <sup>c</sup> | 32.0 (25.4-39.2) | 28.4 (21.5-36.9)  | 25.6 (24.2-31.6)  | -.337     | 0.08                    |
| <i>n</i> =                                                                                                                                                                                                                                                                                                                                     | 7                     | 17               | 4                 |                   |           |                         |
| CSF                                                                                                                                                                                                                                                                                                                                            | Entire group          | 0.33 (0.20-0.76) | 0.40 (0.15-1.25)  | 0.25 (0.22-0.84)  | .065      | 0.47                    |
|                                                                                                                                                                                                                                                                                                                                                | <i>n</i> =            | 13               | 19                | 3                 |           |                         |
|                                                                                                                                                                                                                                                                                                                                                | Carriers              | 0.29 (0.20-0.46) | 0.34 (0.15-0.44)  | 0.23 (0.22-0.25)  | -.106     | 0.66                    |
|                                                                                                                                                                                                                                                                                                                                                | <i>n</i> =            | 10               | 11                | 2                 |           |                         |
|                                                                                                                                                                                                                                                                                                                                                | Controls              | 0.64 (0.60-0.76) | 0.77 (0.62-1.25)  | 0.84 <sup>b</sup> | .367      | 0.32                    |
| <i>n</i> =                                                                                                                                                                                                                                                                                                                                     | 3                     | 8                | 1                 |                   |           |                         |
| Comparisons of median (range) PGRN levels (plasma and CSF in ng/ml) within genotype of rs5848, rs646776 and rs1990622. <sup>a</sup> Multivariate regression with correction for age and gender; <sup>b</sup> n=1, therefore no range is displayed; <sup>c</sup> genotyping for rs1990622 failed in one presymptomatic carrier and one control. |                       |                  |                   |                   |           |                         |
