# Supplementary material for: Progranulin Levels in Plasma and Cerebrospinal Fluid in Granulin Mutation Carriers
Source: PubMed Central journal article supplement — Dement Geriatr Cogn Dis Extra. 2016 Jul 22;6(2):330–40. doi: 10.1159/000447738 (PMC5040889; doi:10.1159/000447738), 2016-07-22
Supplement: dee-0006-0330-s02.pdf [file dee-0006-0330-s02.pdf]

## Progranulin levels in plasma and CSF in granulin mutation carriers

Lieke H.H. Meeter MD, Holger Patzke PhD, Gordon Loewen PhD, Elise G.P. Dopfer PhD, Yolande A.L. Pijnenburg PhD MD, Rick van Minkelen PhD, Prof. John C. van Swieten PhD MD

### *Supplementary Material – Supplementary Figure 1*

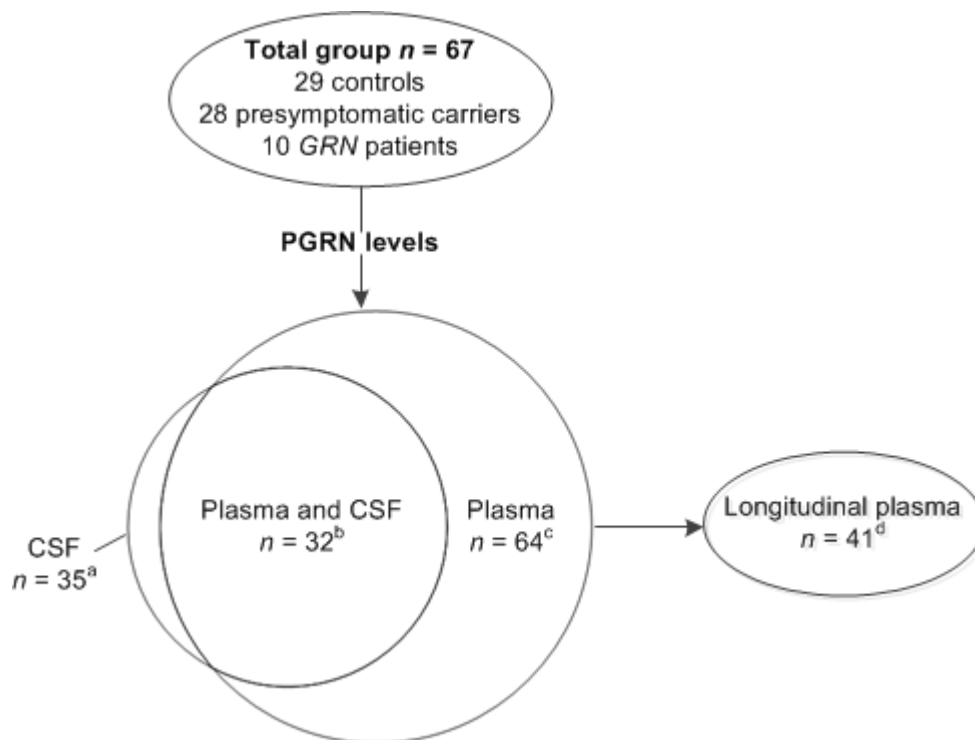

**Supplementary Figure 1** Number of subjects per type of collected sample. <sup>a</sup>12 controls, 16 presymptomatic carriers and 7 *GRN* patients; <sup>b</sup>12 controls, 16 presymptomatic carriers and 4 *GRN* patients; <sup>c</sup>29 controls, 28 presymptomatic carriers and 7 *GRN* patients; <sup>d</sup>19 controls, 18 presymptomatic carriers and 4 *GRN* patients.
