# Supplementary material for: Progranulin Levels in Plasma and Cerebrospinal Fluid in Granulin Mutation Carriers
Source: PubMed Central journal article supplement — Dement Geriatr Cogn Dis Extra. 2016 Jul 22;6(2):330–40. doi: 10.1159/000447738 (PMC5040889; doi:10.1159/000447738), 2016-07-22
Supplement: dee-0006-0330-s03.pdf [file dee-0006-0330-s03.pdf]

## Progranulin levels in plasma and CSF in granulin mutation carriers

Lieke H.H. Meeter MD, Holger Patzke PhD, Gordon Loewen PhD, Elise G.P. Dopfer PhD, Yolande

A.L. Pijnenburg PhD MD, Rick van Minkelen PhD, Prof. John C. van Swieten PhD MD

### *Supplementary Material – Supplementary Figure 2*

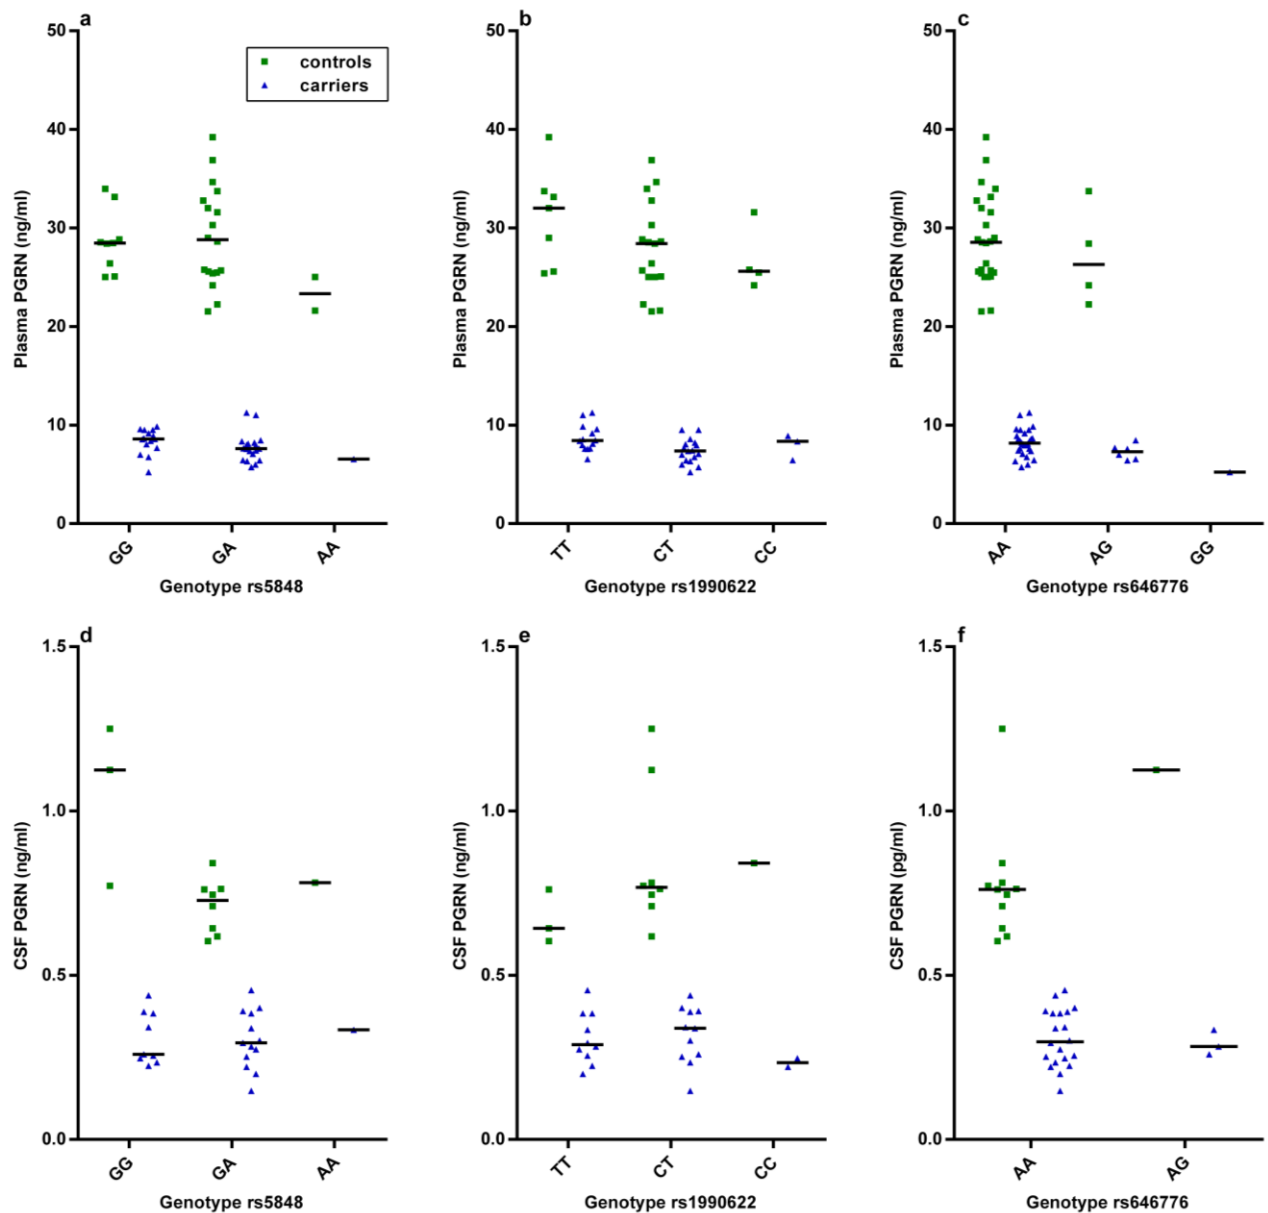

**Supplementary Figure 2** Associations of SNPs versus PGRN levels. Scatterplots of rs5848, rs646776 and rs1990622 genotype with plasma PGRN (a, b and c) and with CSF PGRN (d, e and f) , data points represent individual values and horizontal lines are median PGRN levels per group

(carriers of a pathogenic *GRN* mutation versus controls). Genotyping for rs1990622 failed in one presymptomatic *GRN* mutation carrier and one control.
